# Supplementary material for: Effectiveness of an Intervention Programme on Adherence to the Mediterranean Diet in a Preschool Child: A Randomised Controlled Trial
Source: MDPI journal article supplement (doi:10.3390/nu14081536), 2022-04-07
Supplement: s1 [file s1]

**Table S1.** Homogeneity analysis for parental sociodemographic variables.

|                                     |                    | Experimental group (n = 65) | Control group (n = 68) | p Value |
|-------------------------------------|--------------------|-----------------------------|------------------------|---------|
| Mean initial age (SD)               |                    | 31.02 (4.815)               | 31.32 (4.333)          | 0.711   |
| Mean father's age (SD)              |                    | 32.39 (8.023)               | 32.55 (7.465)          | 0.908   |
| Mother's level of education, n (%)  | Primary            | 6 (9.8)                     | 7 (10.3)               | 0.632   |
|                                     | Secondary          | 41 (67.2)                   | 45 (68.2)              |         |
|                                     | University         | 11 (18.0)                   | 12 (18.2)              |         |
|                                     | None               | 3 (4.9)                     | 2 (3.0)                |         |
| Father's level of education, n (%)  | Primary            | 7 (11.9)                    | 7 (11.1)               | 0.992   |
|                                     | Secondary          | 39 (66.1)                   | 42 (66.7)              |         |
|                                     | University         | 13 (22.0)                   | 14 (22.2)              |         |
| Mother's socioeconomic level, n (%) | No qualification,  | 3 (7.5)                     | 3 (7.0)                | 0.884   |
|                                     | Auxiliary          | 21 (52.5)                   | 23 (53.5)              |         |
|                                     | Technical          | 10 (25.0)                   | 12 (27.9)              |         |
|                                     | University         | 5 (12.5)                    | 5 (11.6)               |         |
|                                     | Not working        | 1 (2.5)                     | 0 (0.0)                |         |
| Father's socioeconomic level, n (%) | No qualifications, | 6 (10.3)                    | 8 (17.2)               | 0.971   |
|                                     | Auxiliary          | 13 (22.4)                   | 15 (23.8)              |         |
|                                     | Technical          | 33 (56.9)                   | 34 (54.0)              |         |
|                                     | University         | 6 (10.3)                    | 6 (9.5)                |         |
| Father's ethnicity, n (%)           | Mediterranean      | 45 (73.8)                   | 49 (72.4)              | 0.975   |
|                                     | Caucasian          | 4 (6.6)                     | 5 (7.6)                |         |
|                                     | American           | 2 (3.3)                     | 3 (4.5)                |         |
|                                     | Asian              | 1 (1.6)                     | 1 (1.5)                |         |
|                                     | Saharan            | 3 (4.9)                     | 4 (6.1)                |         |
|                                     | Gitano Gypsy       | 6 (9.8)                     | 4 (6.1)                |         |

SD, Standard deviation.
